# Supplementary material
Source: PubMed Central journal article supplement (PMC2533692)
Supplement: NIHMS61234-supplement-si20060522_045.pdf [file NIHMS61234-supplement-si20060522_045.pdf]

**Supporting Information for**

**“Recognition and Incision of Oxidative Intrastrand Cross-link Lesions by  
UvrABC Nuclease”**

**by**

Chunang Gu, Qibin Zhang, Zhengguan Yang, Yue Zou and Yinsheng Wang  
(*Biochemistry*, Vol. 45, 2006, bi060423z)

## List of Figures

**Figure S1.** ESI-MS of the starting materials: (A) d(GTAG<sup>Br</sup>CAT); (B) d(ATGGCG<sup>PhSm</sup>CGCTAT); (c) d(ATGGCG<sup>PhSm</sup>UGCTAT).

**Figure S2.** HPLC trace for the separation of the UVC irradiation mixture of single-stranded d(GTATTAT).

**Figure S3.** Isolation and characterization of d(GTAG[8-5]CAT). (A) HPLC trace for the separation of the 310-nm irradiation mixture of d(GTAG<sup>Br</sup>CAT) with TEAA buffer. (B) HPLC trace for the re-separation of d(GTAG[8-5]CAT) with phosphate buffer. (C) Negative-ion ESI-MS of d(GTAG[8-5]CAT). (C) Product-ion spectrum of the ESI-produced [M-3H]<sup>3-</sup> ion (*m/z* 1058.0) of d(GTAG[8-5]CAT).

**Figure S4.** Isolation and characterization of d(ATGGCG[8-5m]CGCTAT). (A) HPLC trace for the separation of the 254-nm irradiation mixture of d(ATGGCG<sup>PhSm</sup>CGCTAT). (B) Negative-ion ESI-MS of d(ATGGCG[8-5m]mCGCTAT). (C) Product-ion spectrum of the ESI-produced [M-3H]<sup>3-</sup> ion (*m/z* 1223.0) of d(ATGGCG[8-5m]mCGCTAT).

**Figure S5.** Isolation and characterization of d(ATGGCG[8-5m]TGCTAT). (A) HPLC trace for the separation of the 254-nm irradiation mixture of d(ATGGCG<sup>PhSm</sup>UGCTAT) with TEAA buffer. (B) HPLC trace for the re-separation of d(ATGGCG[8-5m]TGCTAT) with phosphate buffer. (C) Negative-ion ESI-MS of d(ATGGCG[8-5m]TGCTAT). (D) Product-ion spectrum of the ESI-produced [M-3H]<sup>3-</sup> ion (*m/z* 1223.0) of d(ATGGCG[8-5m]TGCTAT)

**Figure S6.** Non-linear regression analysis of the plot of average percentage binding (determined from EMSA with three or more sets of titrations per duplex) versus the concentrations of UvrA for duplexes containing: (A) G[8-5]C-54bp; (B) G[8-5m]mC-54bp; (C) G[8-5m]T-54bp.

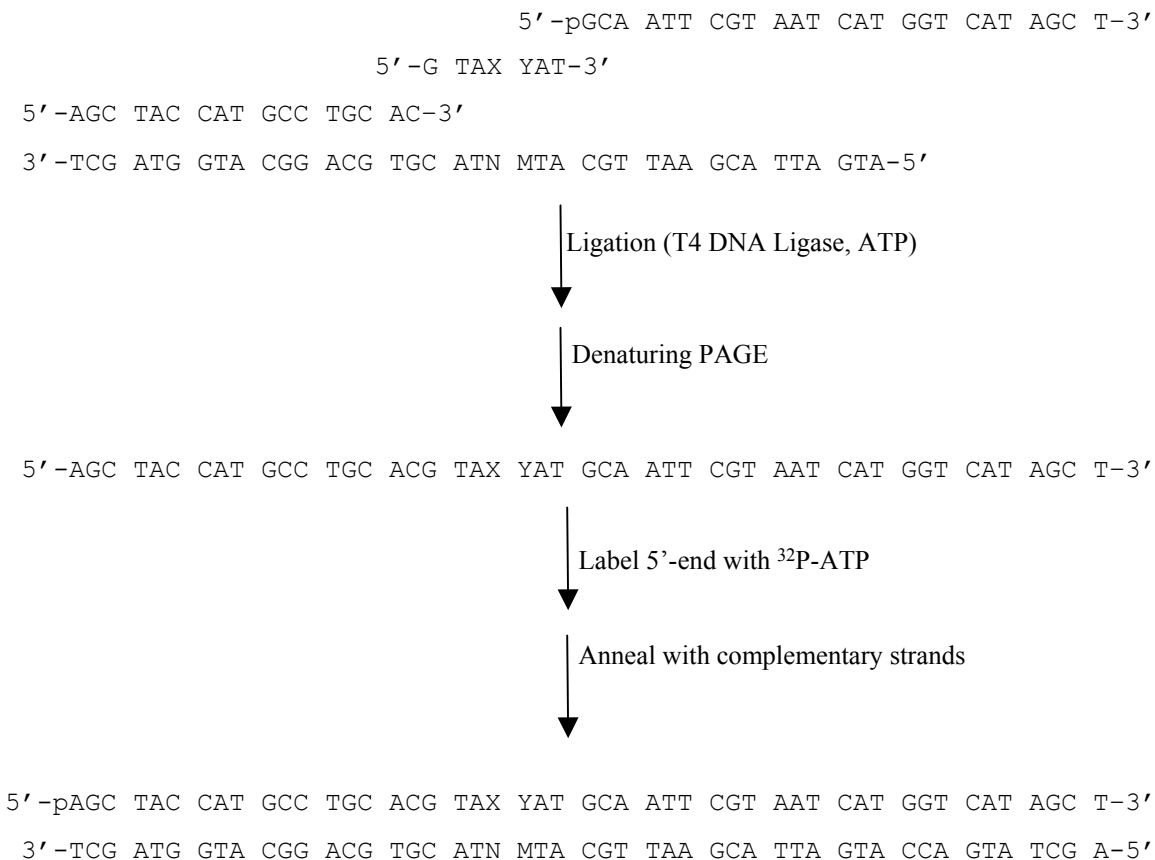

| Sequence     | XY•MN      | Ligation Yield (%) |
|--------------|------------|--------------------|
| T[c,s]T-49bp | T[c,s]T•AA | 25                 |
| T[6-4]T-49bp | T[6-4]T•AA | 5                  |
| G[8-5]C-49bp | G[8-5]C•GC | 12                 |

Scheme S1. (Nucleobases X and Y or M and N of each strand are listed, and both of them are in the 5'-to 3'- sequence order.)

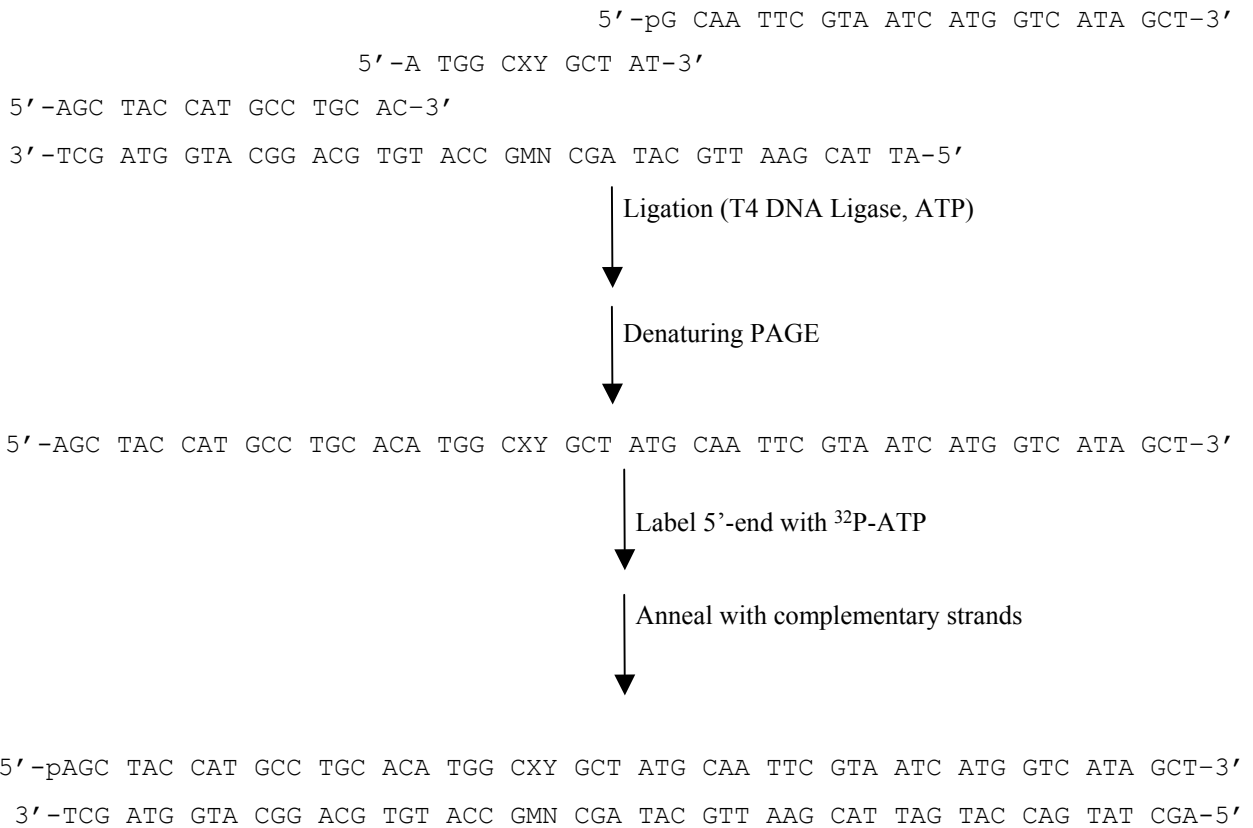

| Sequence       | XY•MN        | Ligation Yield (%) |
|----------------|--------------|--------------------|
| G[8-5]T-54bp   | G[8-5]C•GC   | 21                 |
| G[8-5m]mC-54bp | G[8-5m]mC•GC | 17                 |
| G[8-5m]T-54bp  | G[8-5m]T•AC  | 10                 |

Scheme S2. (Nucleobases X and Y or M and N of each strand are listed, and both of them are in the 5'-to 3'- sequence order.)

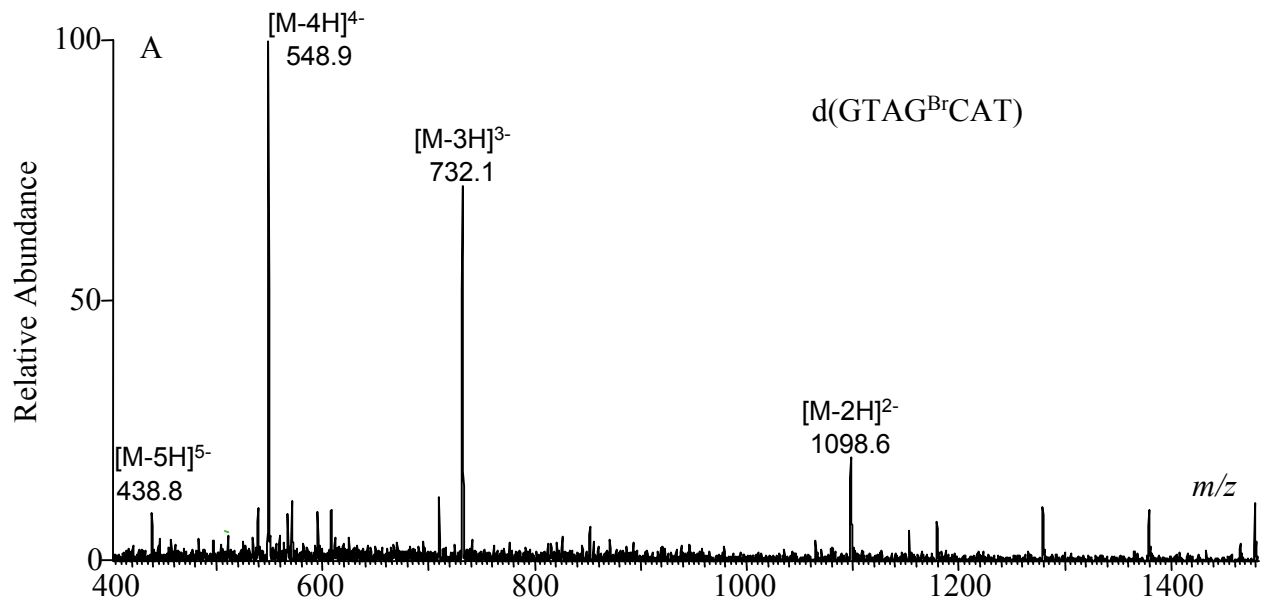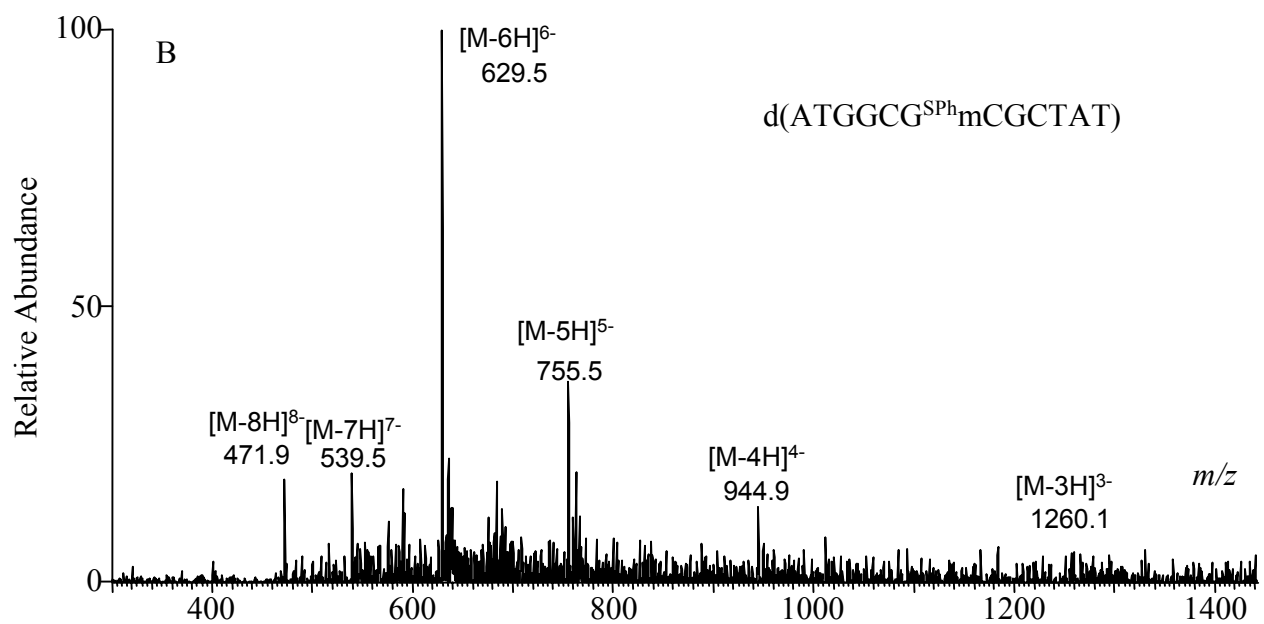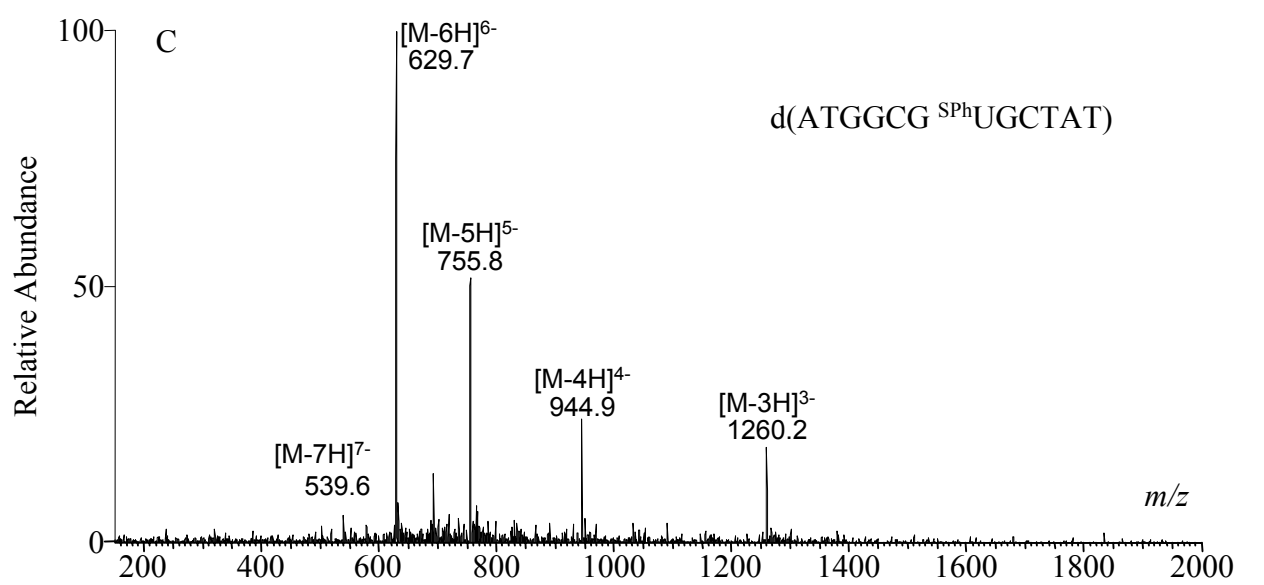

Figure S1.

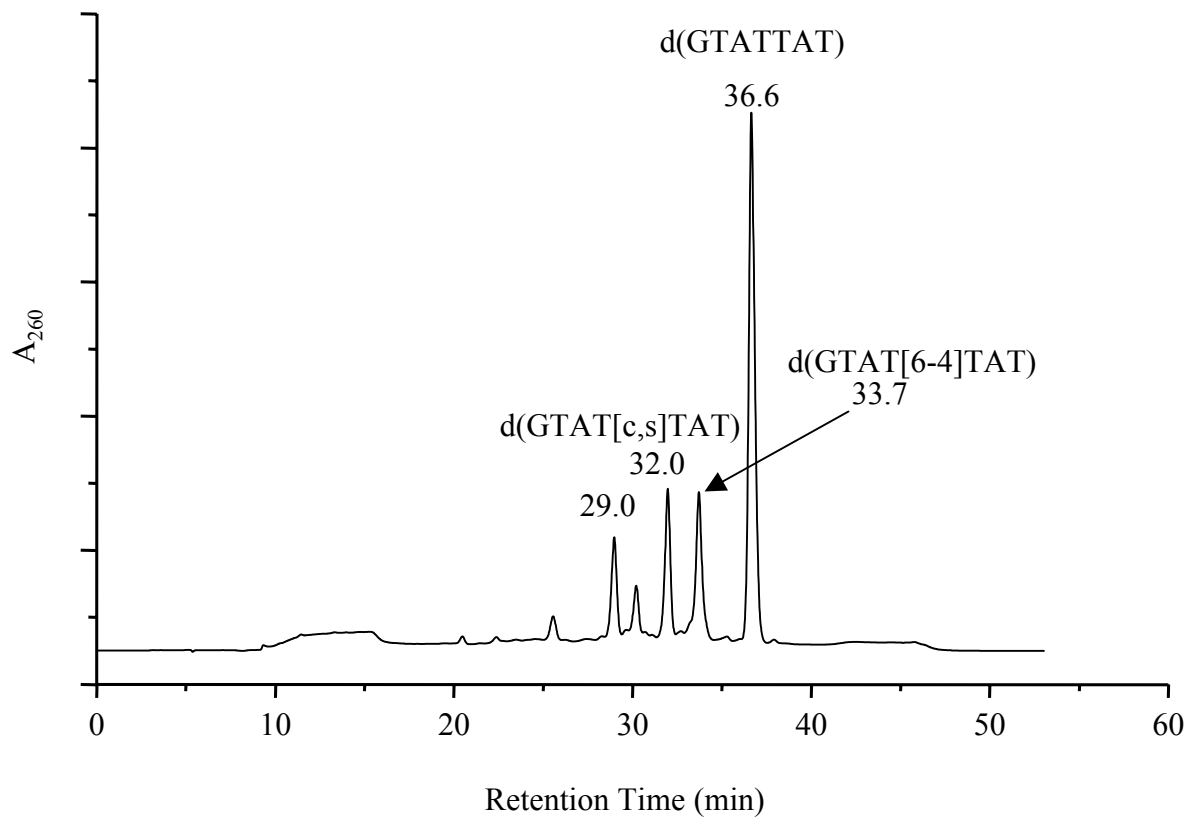

Figure S2.

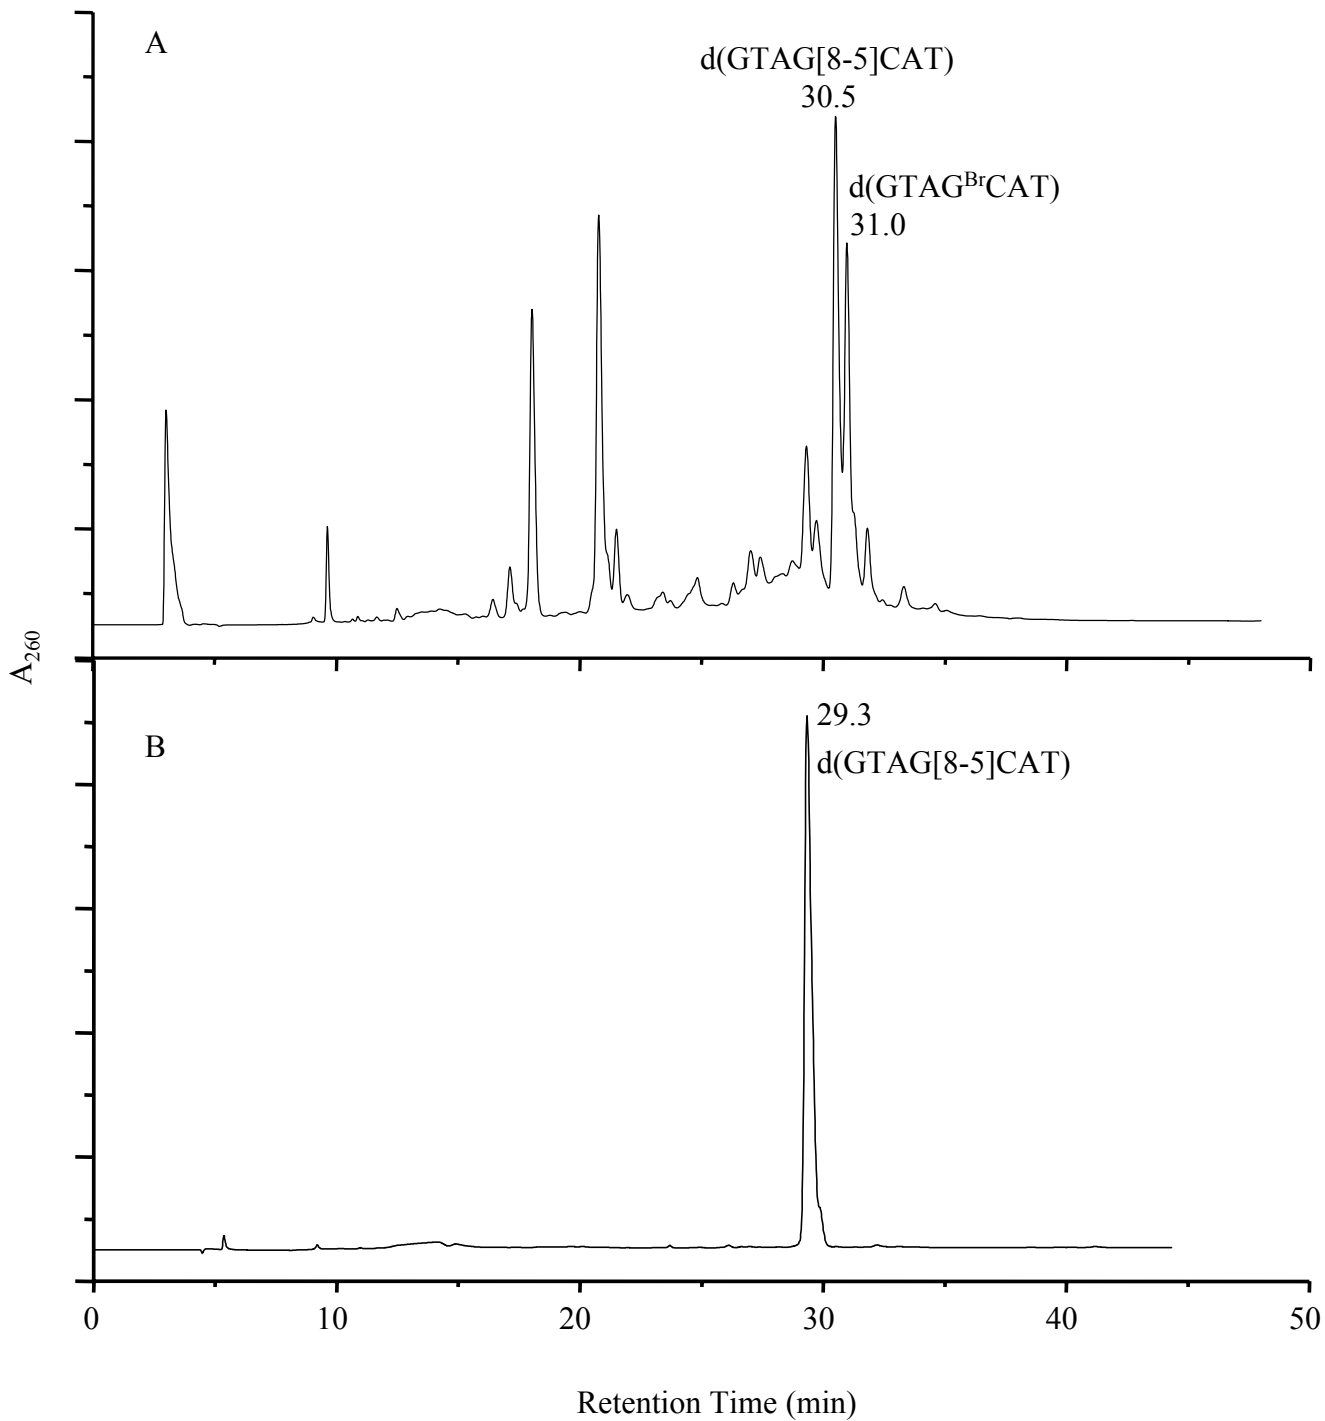

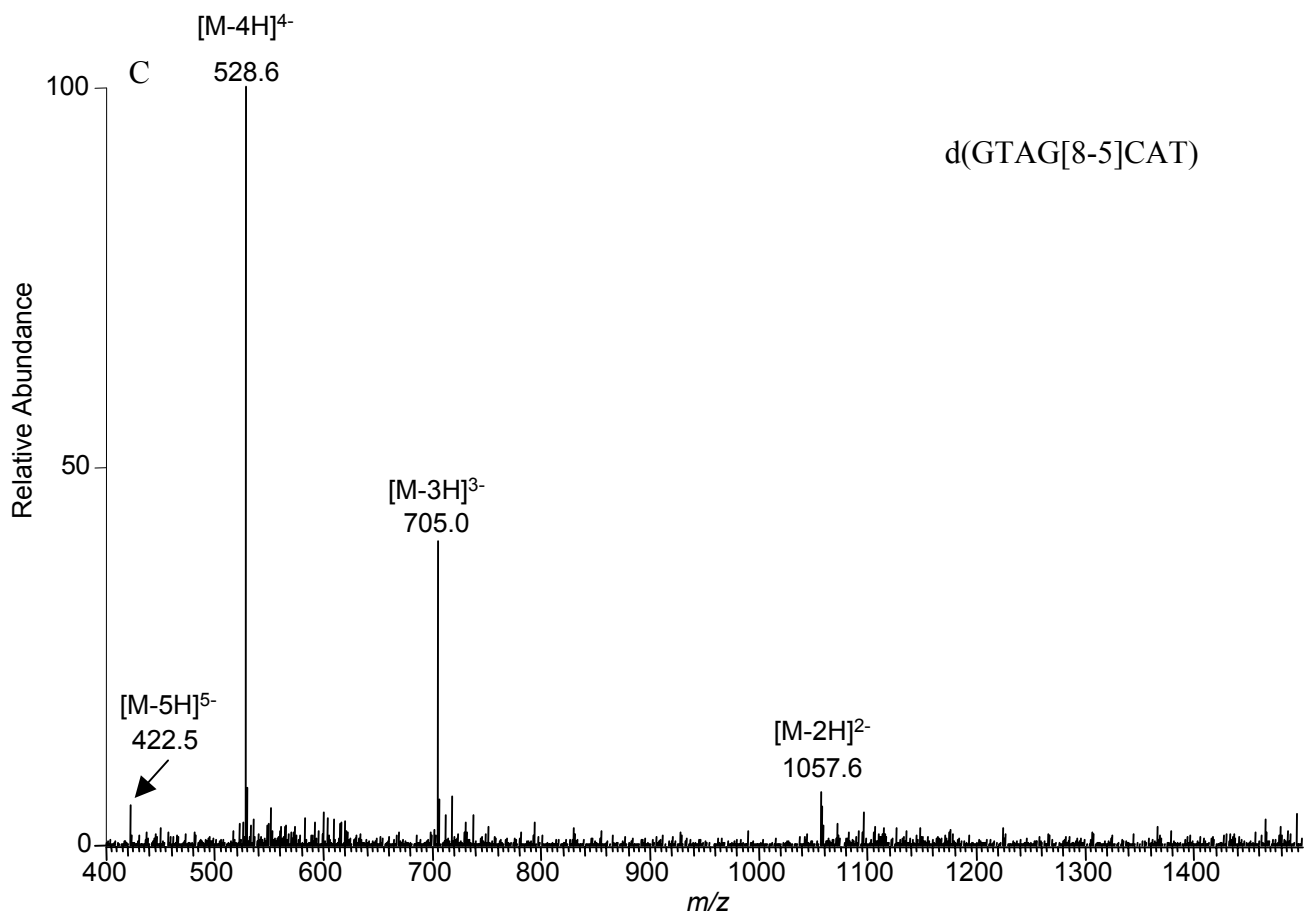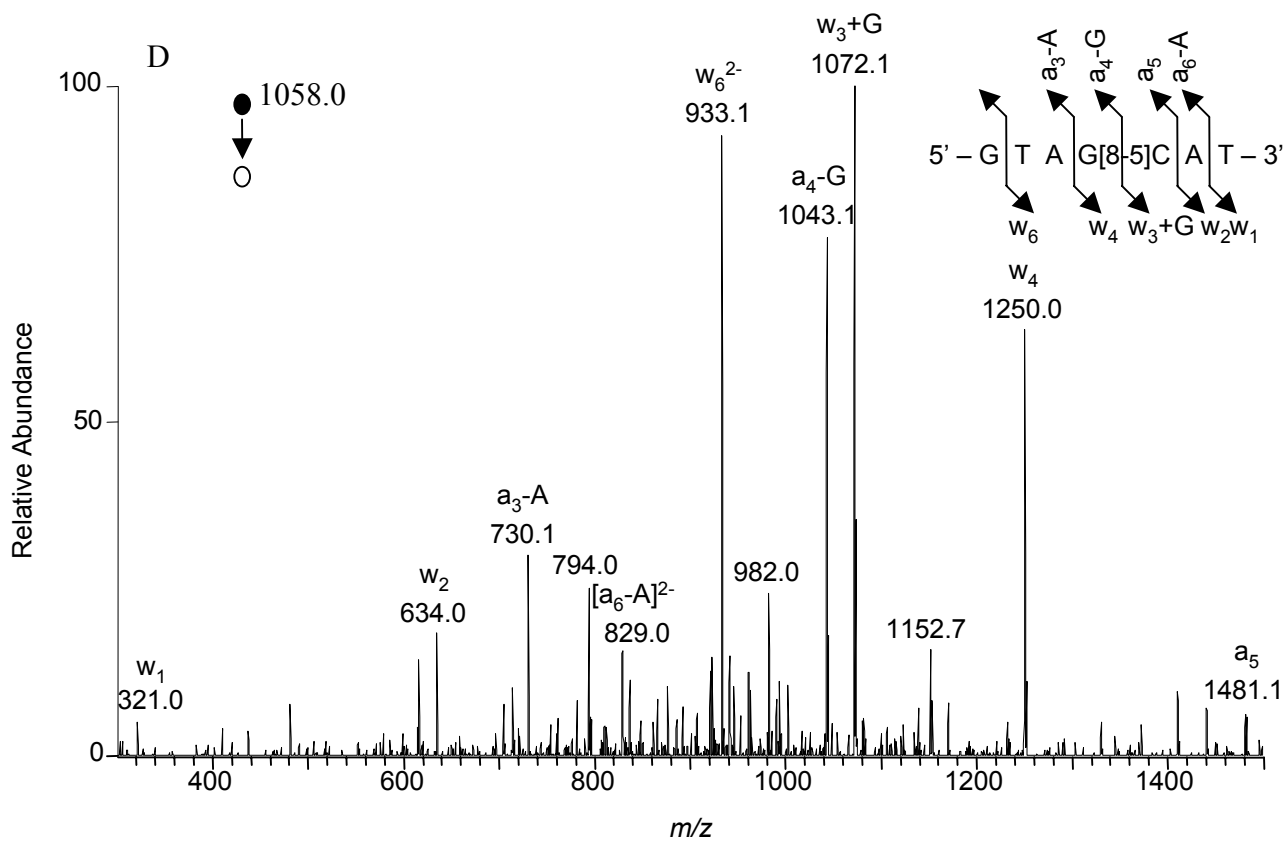

Figure S3.



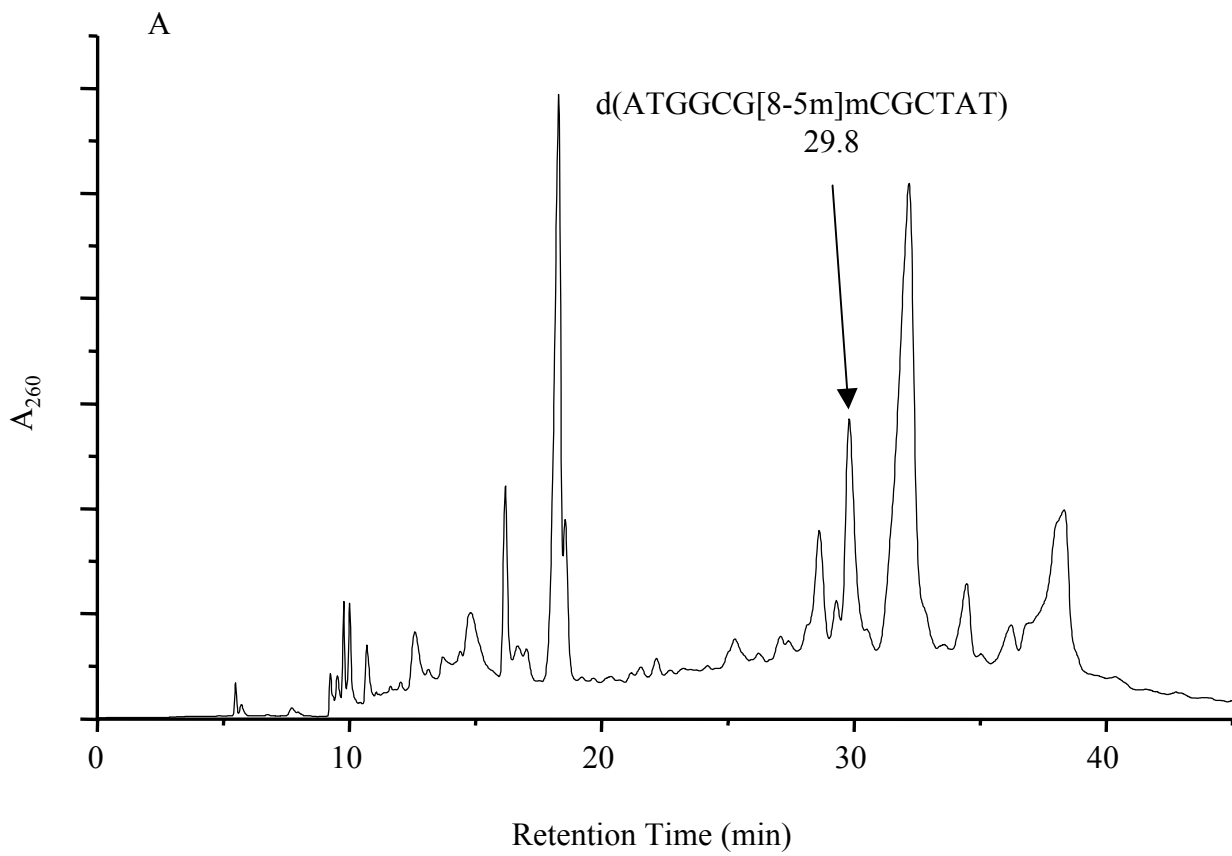

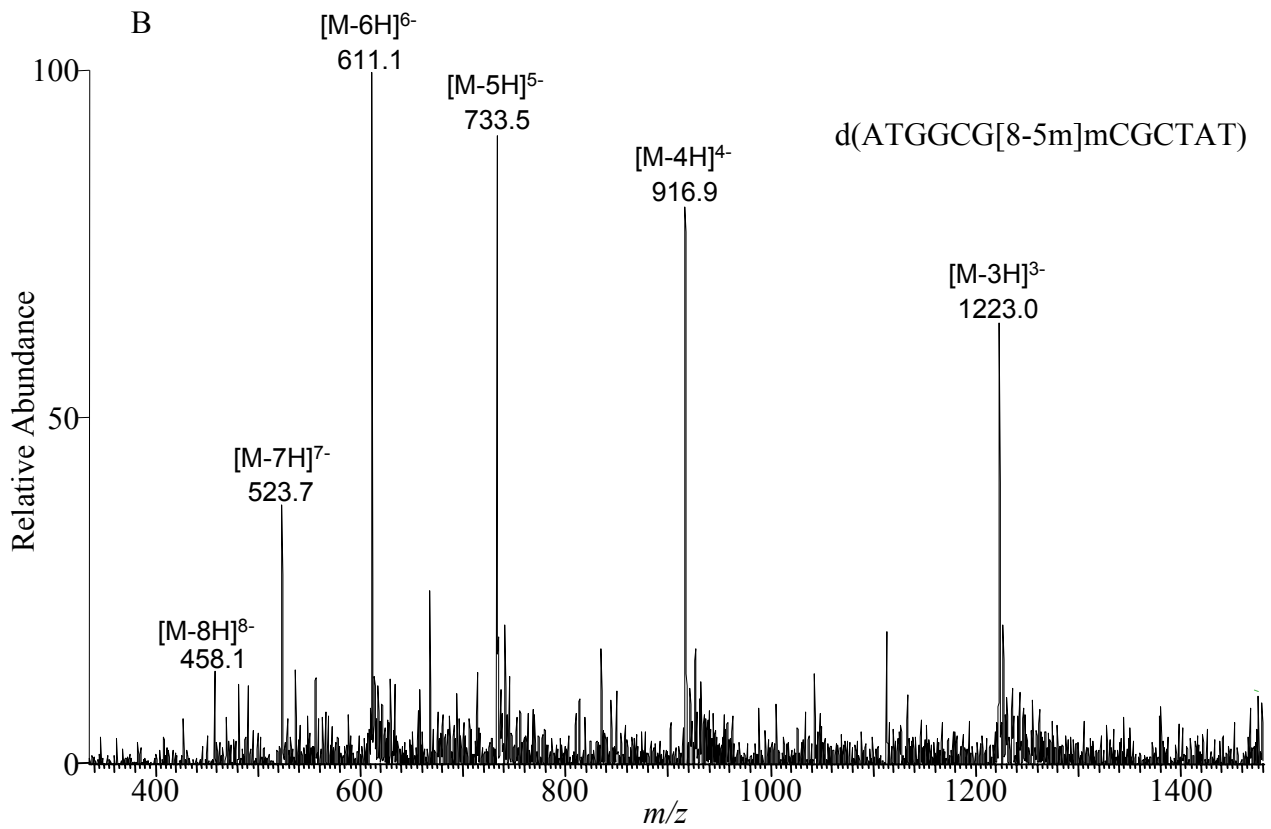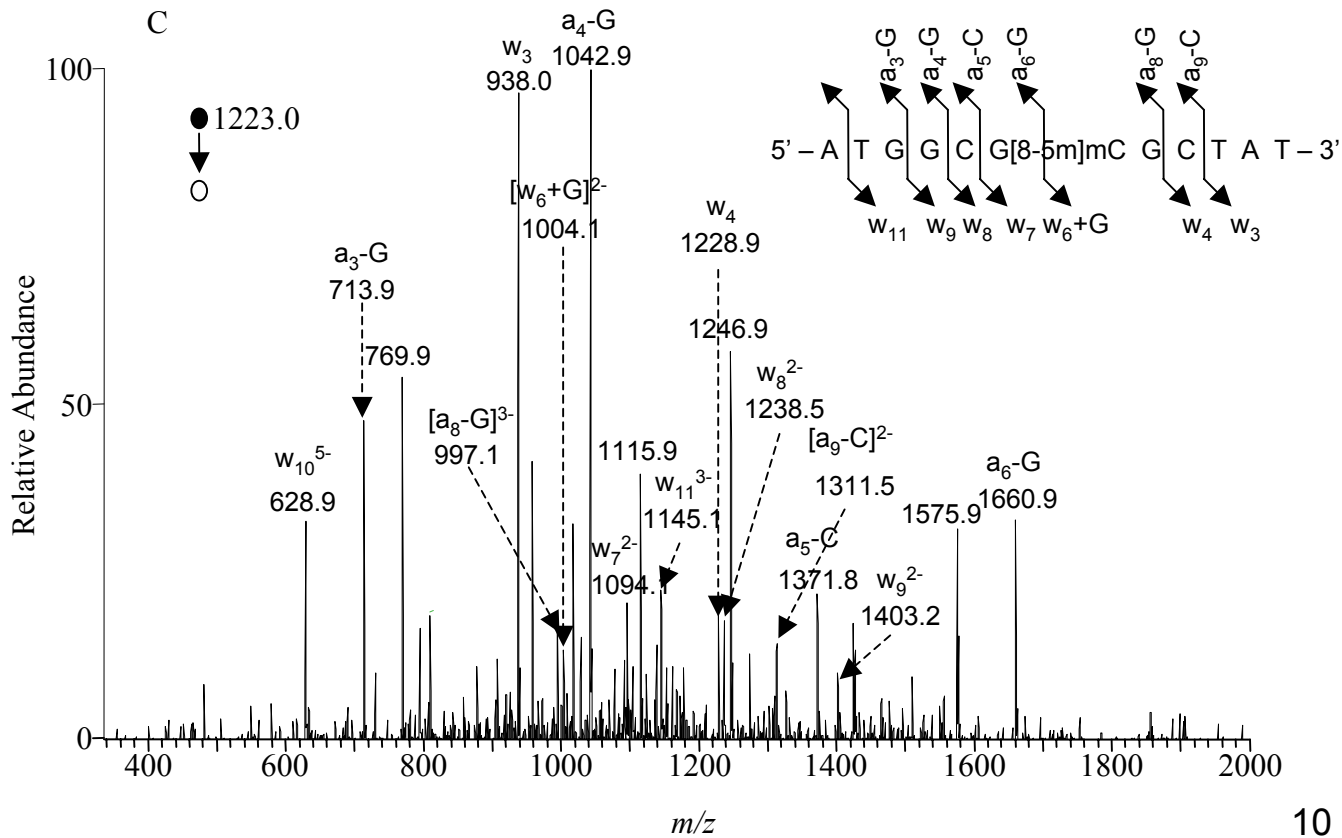

Figure S4.

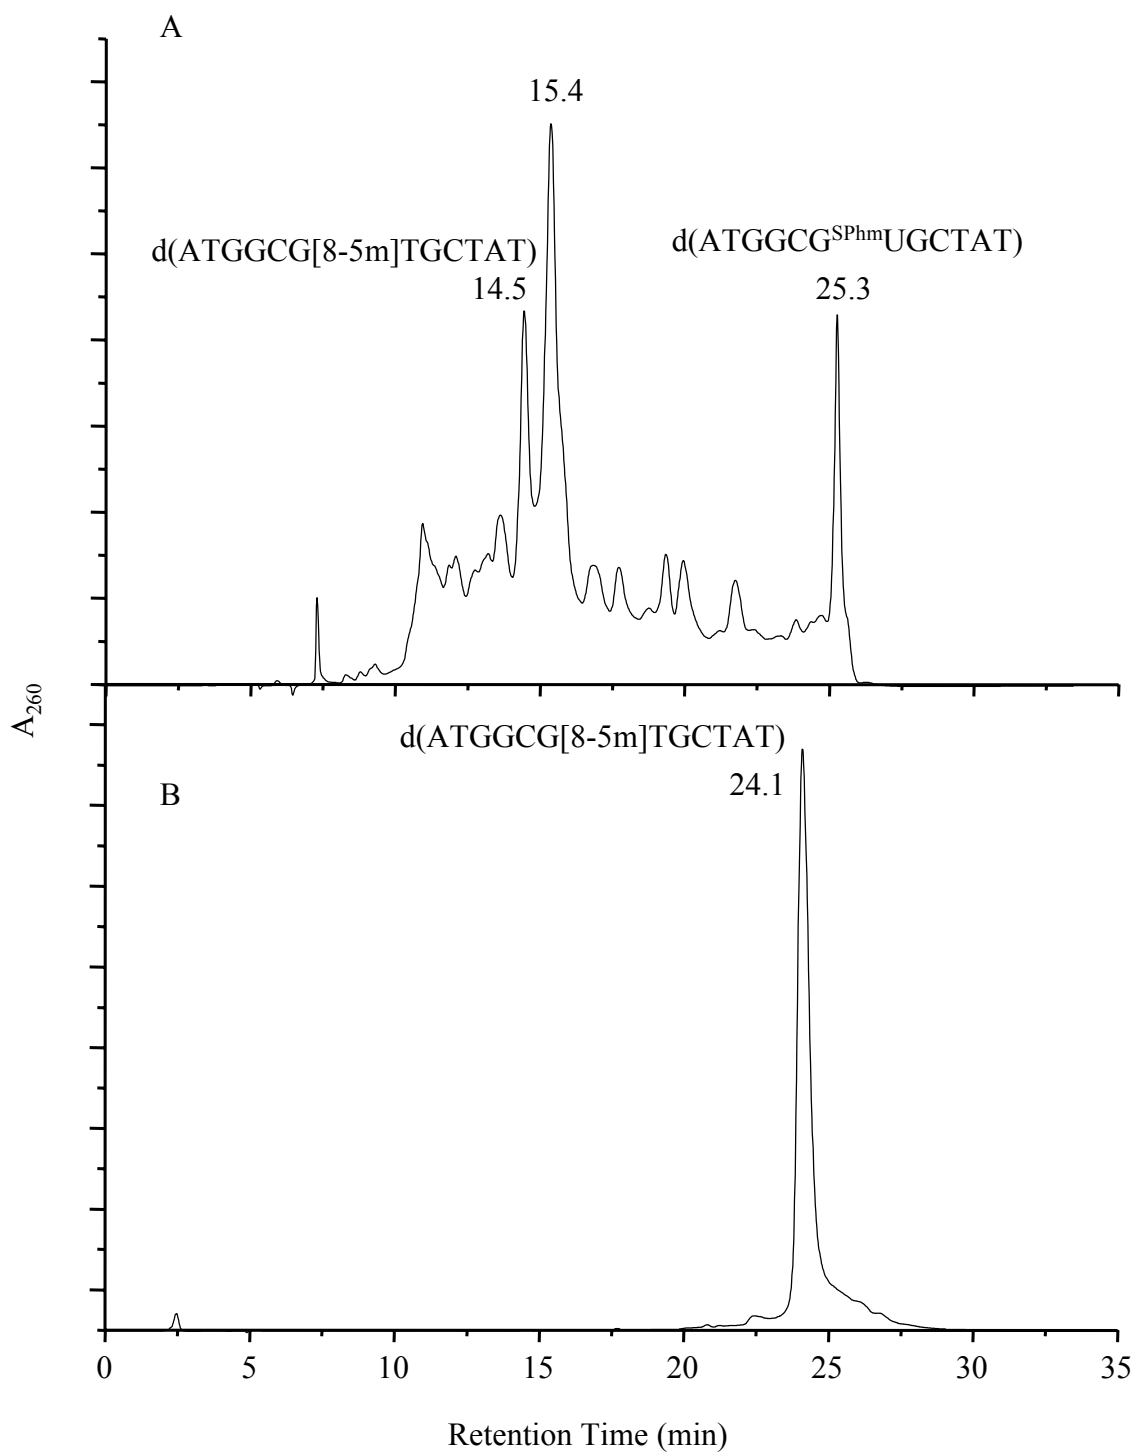

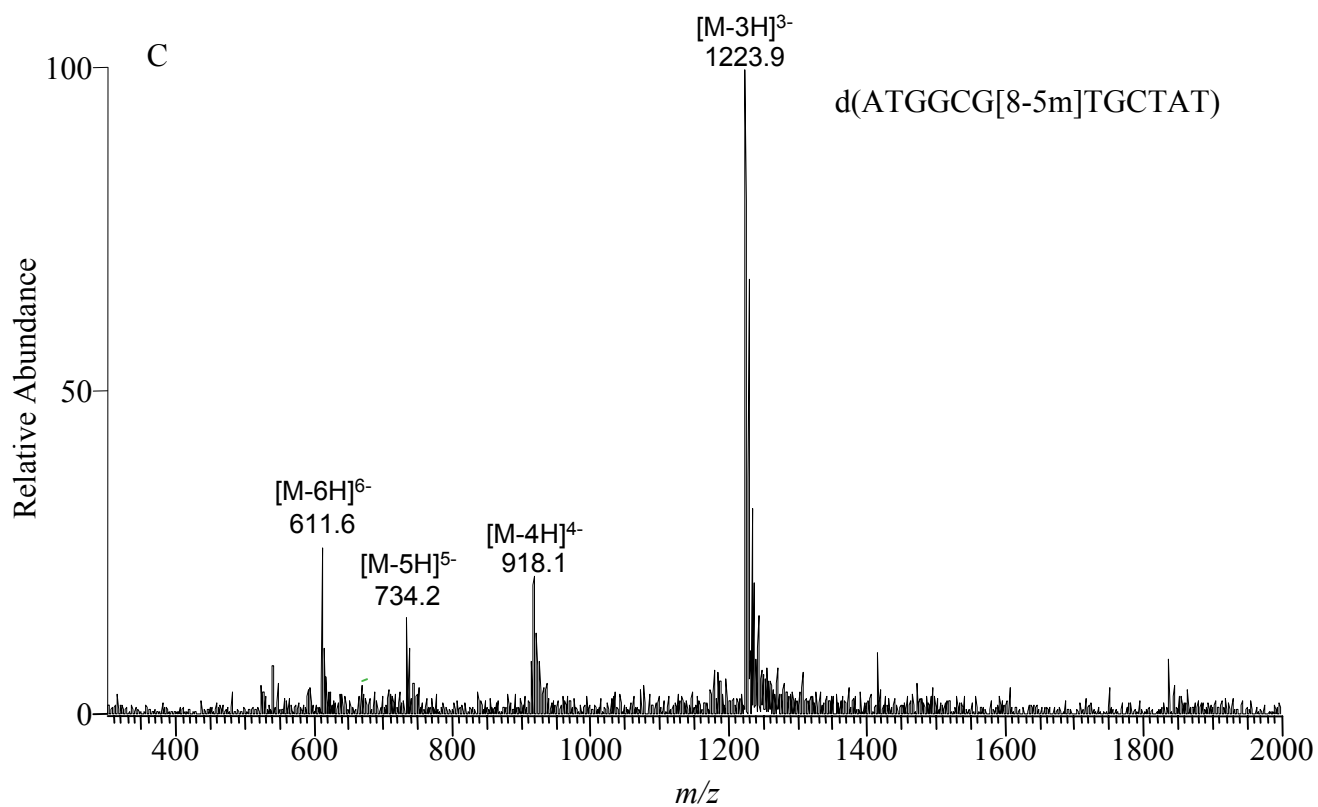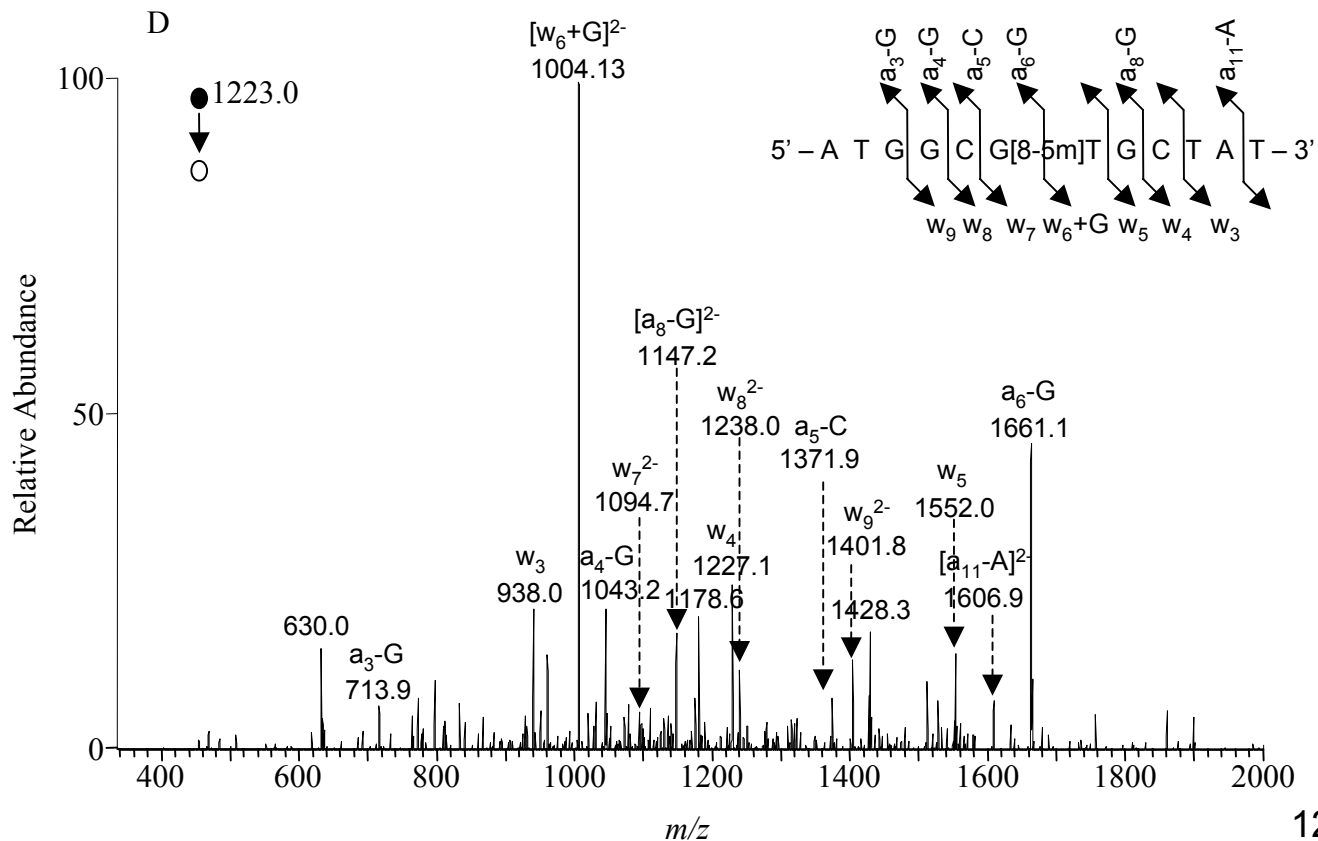

Figure S5.

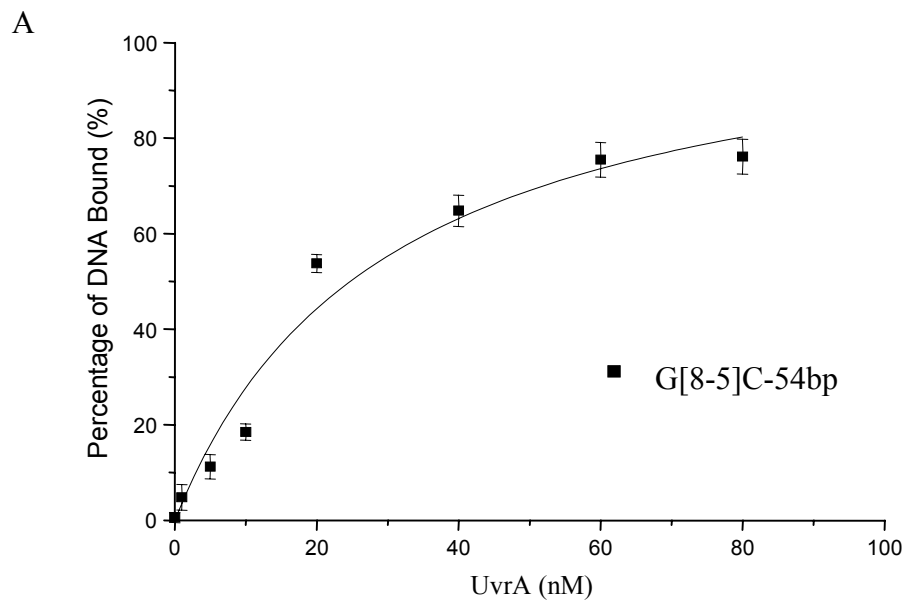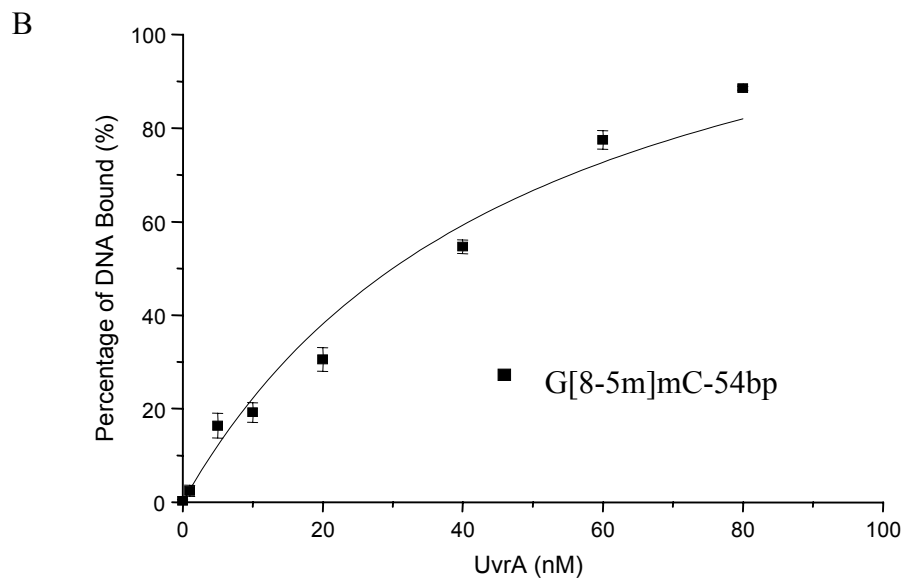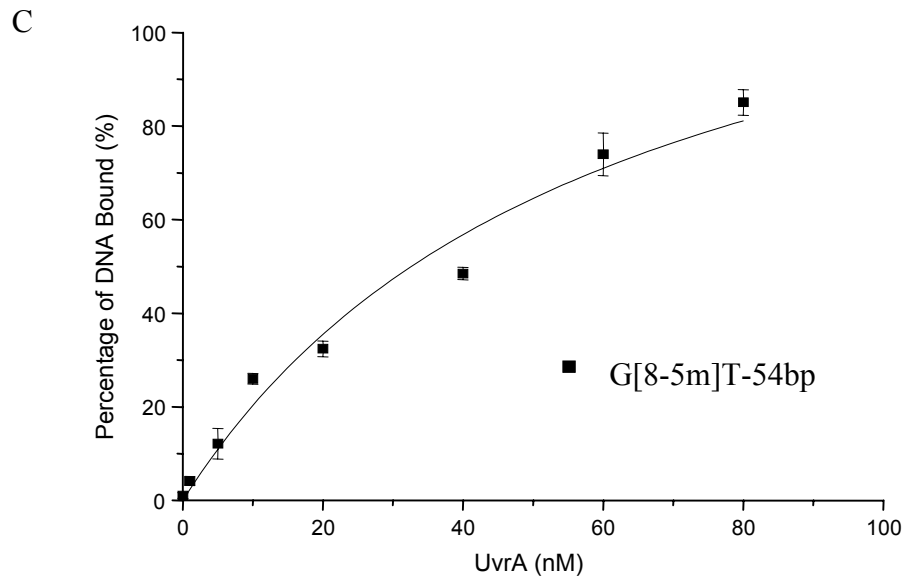

Figure S6.
